# Supplementary material
Source: PubMed Central journal article supplement (PMC3512049)
Supplement: mmc1.pdf [file mmc1.pdf]

# **Force-clamp analysis techniques reveal stretched exponential unfolding kinetics in ubiquitin**

Herbert Lannon\*, Eric Vanden-Eijnden<sup>†</sup>, and J. Brujic\*

\*Department of Physics and Center for Soft Matter Research, New York University, 4 Washington Place, New York, NY, 10003, USA

<sup>†</sup>Courant Institute of Mathematical Sciences, New York University, New York, NY, 10012

## Supporting Materials

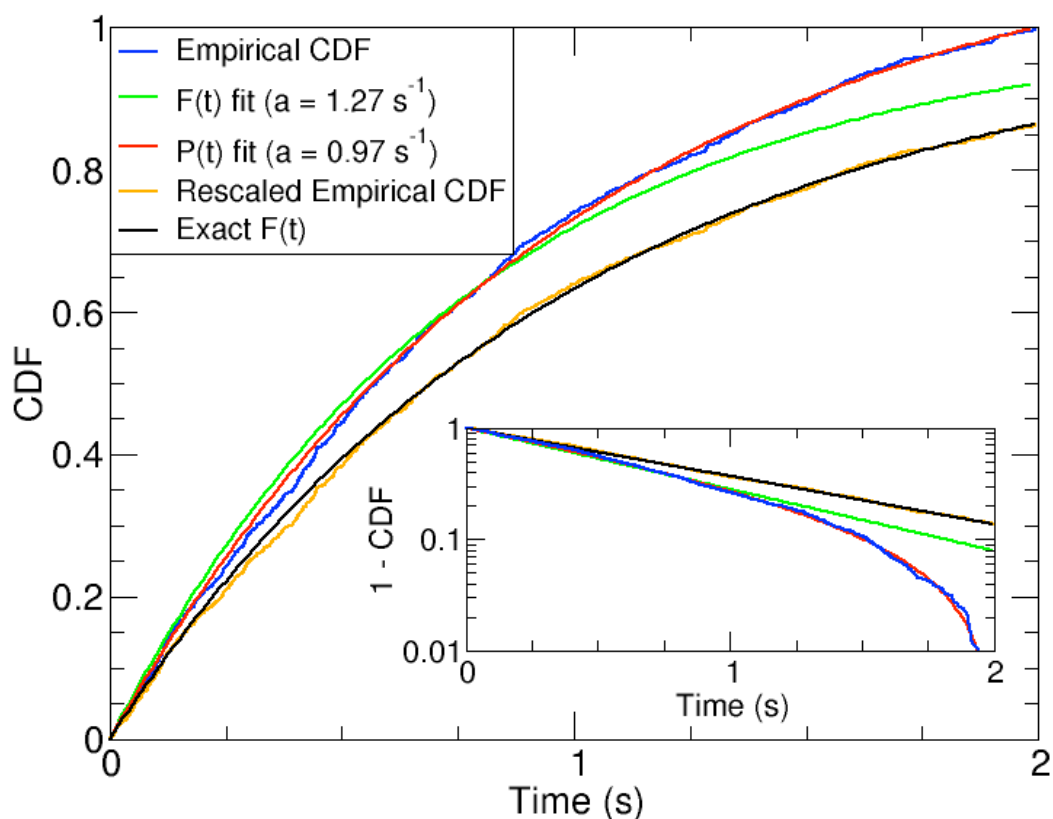

**Figure S1. Comparison of fits of  $P(t)$  and  $F(t)$ .** A synthetic data set is generated by drawing single exponential dwell times with a rate constant of  $a = 1 \text{ sec}^{-1}$  and only keeping those times that are less than  $t_c = 2 \text{ sec}$ . The empirical CDF of the generated data, hat  $P(t)$  [Eq. (1) in the main text], is shown in blue. Fitting using  $P(t)$  (red) [Eq. (2) in the main text] recovers the original constant  $a$  within 3%, while fitting with  $F(t)$  gives rise to a 27% discrepancy. By properly rescaling the empirical CDF (orange) using Eq. (2), the exact  $F(t)$  is recovered (black). Log scale of  $1 - \text{CDF}$  in the inset highlights the changes in shape between  $F(t)$  and  $P(t)$ .

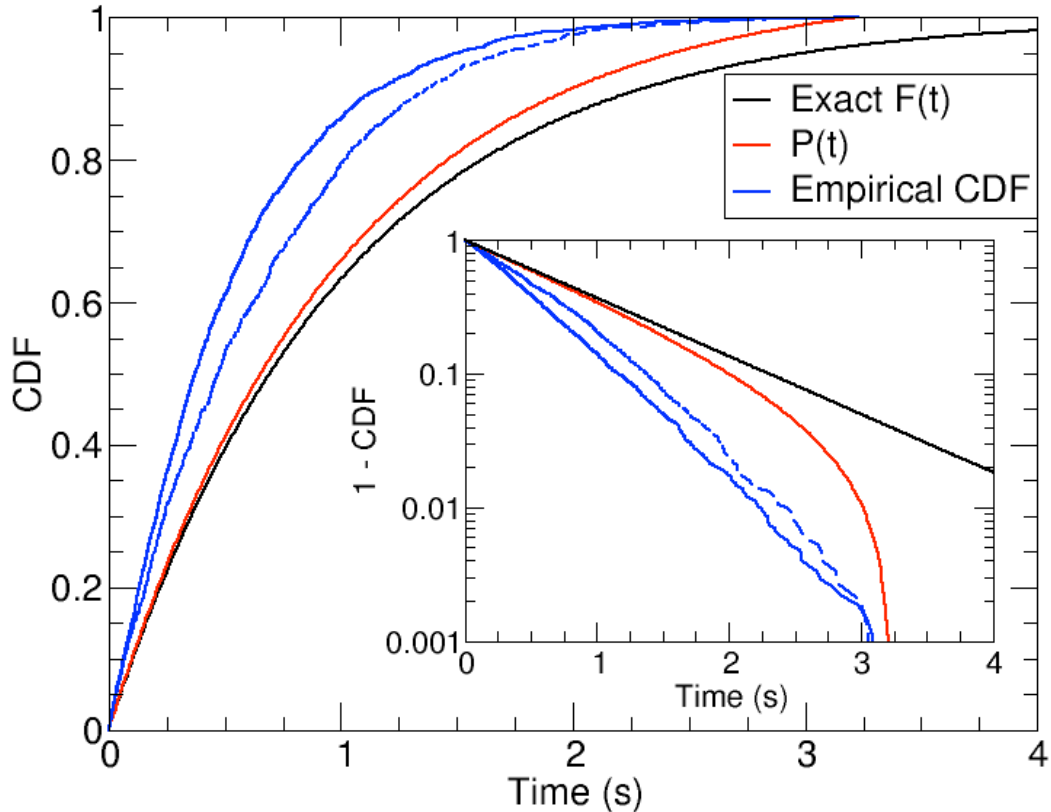

**Figure S2. Mimicking the effects of random detachment time and polyprotein length.** A synthetic dataset is generated by: (i) picking at random a chain of length  $N$  and a detachment time  $t_d$ , (ii) generating  $N$  dwell times from a single exponential distribution with a rate constant  $a = 1 \text{ sec}^{-1}$ , (iii) keeping only those dwell times that are less than  $t_d$ , and (iv) repeating these operations. Operations (i)-(iii) mimic the pulling of a single polyprotein, and by repeating them we generate 1000 dwell times (like in the experiment reported in the main text). The exact exponential  $F(t)$  from which the times were picked is shown in black. The full and dashed blue lines are the two empirical CDFs obtained by the procedure above with two different distributions  $p(N)$  for  $N$ . These CDFs are different from one another, and different from the empirical CDF  $\hat{P}(t)$ , shown in red, that was generated as in Fig. S1, with a  $t_c = 3.25 \text{ sec}$  comparable to the largest dwell time kept in the blue data sets. The inset shows the CDFs plotted on a log scale. We can see large deviations between these CDFs due to the experimental biases from  $N$  and  $t_d$ . How to remove these biases by filtering the datasets is explained in the main text and in Fig. S4.

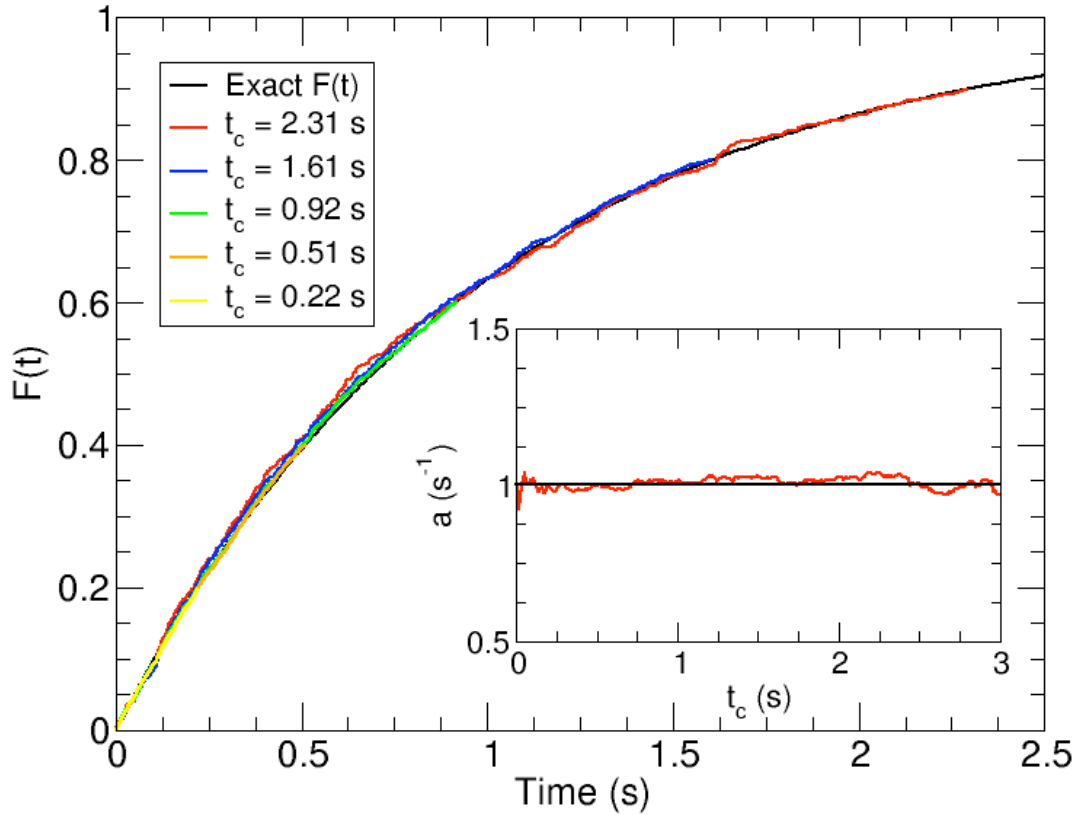

**Figure S3. Correct filtering procedure.** One of the blue datasets shown in Fig. S2 is used to construct empirical CDFs by the filtering procedure described in the main text: keep only the dwell times that (i) are less than a given cutting time  $t_c$  and (ii) come from traces with  $t_d > t_c$ . The exact  $F(t)$  is shown in black. The solid color curves are the empirical CDFs obtained with different cutting times  $t_c$ , and rescaled by  $F(t_c)$ . The inset is a plot of the rate constant  $a$  found by fitting the empirical CDFs, showing that the filtering procedure gives robust values for  $a$  at all  $t_c$ .

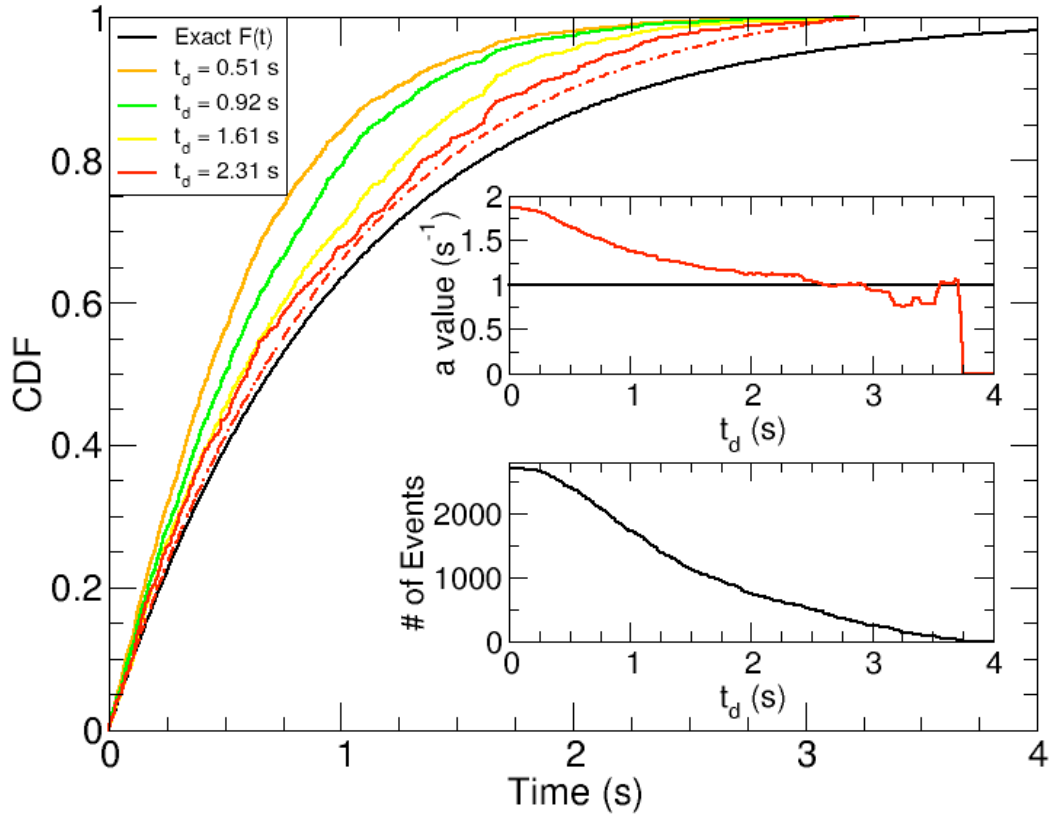

**Figure S4. Naive filtering procedure.** One of the blue datasets shown in Fig. S2 is used to construct empirical CDFs by a naive filtering in which all the dwell times less than  $t_d$  are kept (solid colored curves). The exact  $F(t)$  is shown in black. Due to the experimental biases from  $N$  and  $t_d$ , each empirical CDF is different from the corresponding  $P(t)$  obtained by setting  $t_{\max} = t_d$  in Eq. (2) in main text, and they only begin to match as  $t_d$  is increased: the dashed line shows  $P(t)$  for  $t_{\max} = t_d = 2.31$ s. The top inset is a plot of the rate constant  $a$  found by fitting the empirical CDFs, showing that this naive filtering procedure cannot recover the correct value for  $a$ . The bottom inset is a plot of the number of points remaining in the dataset at different  $t_d$ .

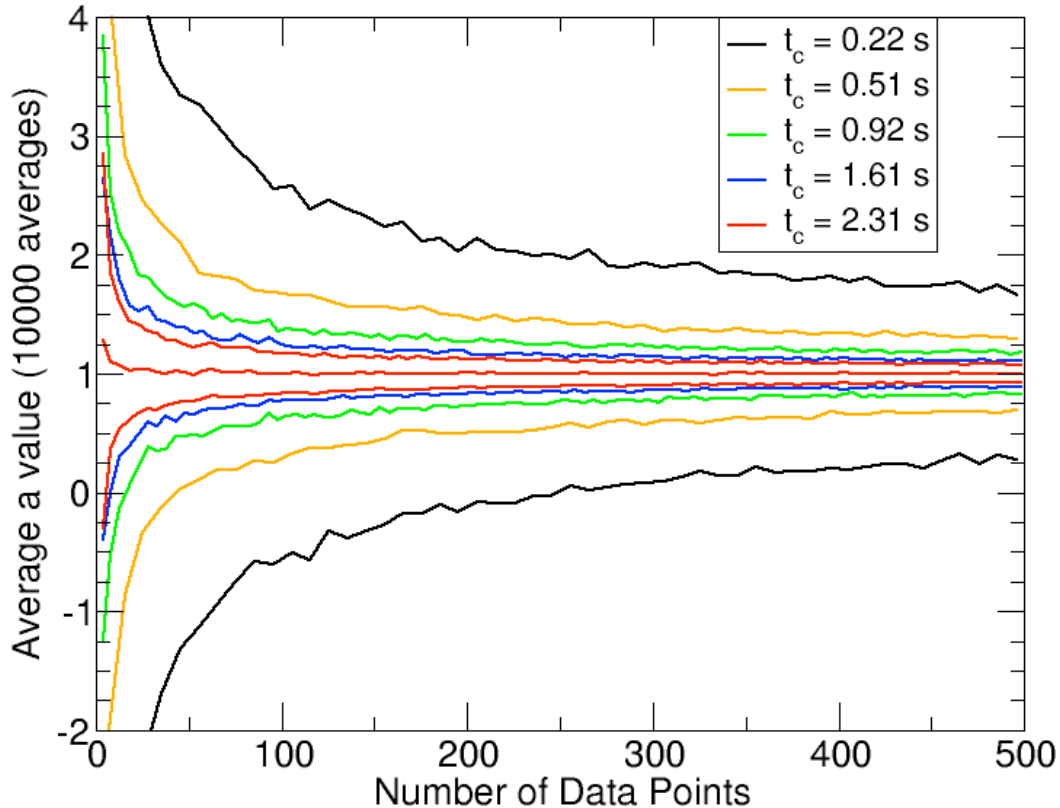

**Figure S5. Error analysis.** Rate constant value found by MLE fitting to empirical CDFs constructed using Eq. (2) in the main text with different  $t_{\max} = t_c$ , effectively mimicking an experiment with a finite ending time. Dwell time datasets of varying size were generated using an exponential distribution with  $a = 1 \text{ sec}^{-1}$ . At each dataset size, 1000 datasets were generated and fit to give an average value and a standard deviation for the rate constant found. The fitting at each  $t_c$  recovers the rate constant used in generating the data, seen as a flat red line at  $a = 1 \text{ sec}^{-1}$ . The confidence intervals of one standard deviation in the fits at each  $t_c$  are seen as solid colored lines. The fits become more accurate as either the number of points in the data set or  $t_c$  grow. In particular, for a fixed number of dwell times in the dataset, a larger time window in the experiment gives more accurate results.

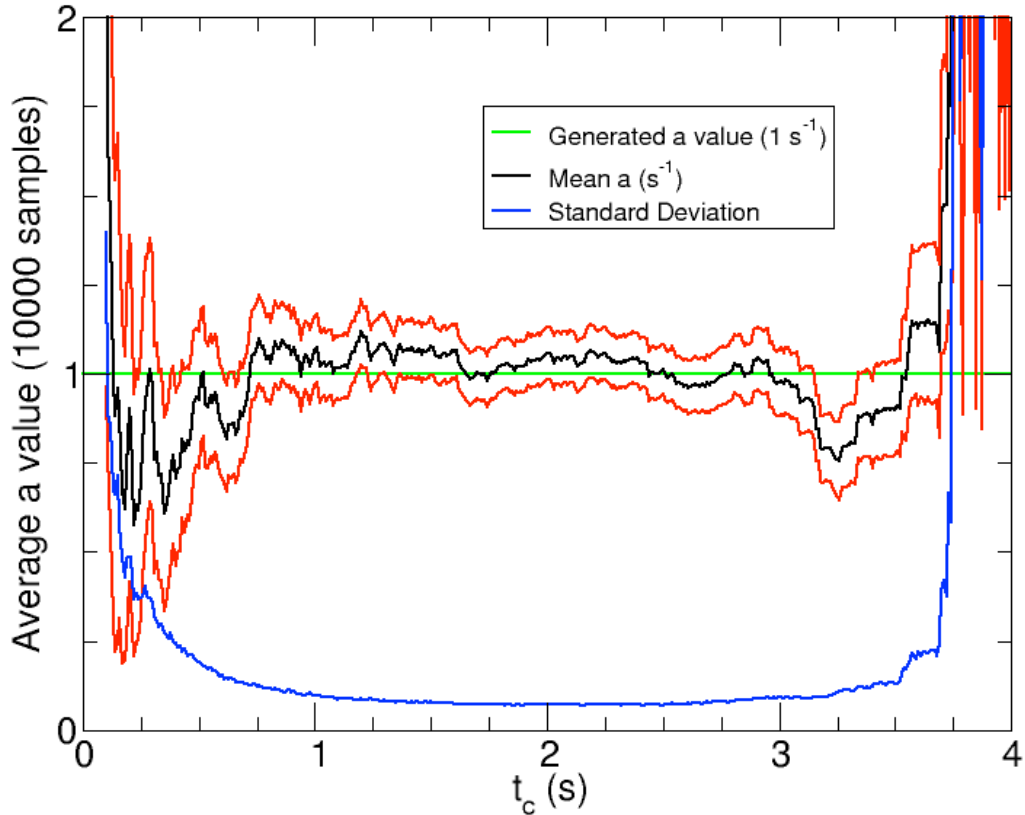

**Figure S6. Bayesian sampling.** Rate constant found by fitting the empirical CDFs constructed from an exponential dataset with  $a = 1 \text{ sec}^{-1}$  (green line) using different  $t_c = t_{\text{max}}$  values. The fits were obtained by Bayesian sampling to find the mean  $a$  (black curve) and its interval of confidence at one standard deviation (red curves). The absolute value of the standard deviation is shown in blue. At small and large  $t_c$  values, the standard deviation is large and the fitting is inaccurate. For  $t_c$  between 1 and 3 sec, the standard deviation is small and the fits are accurate. For  $t_c < 1$  sec the range of the empirical CDFs is too short, resulting in poor accuracy; for  $t_c > 3$  sec the number of points kept in the dataset becomes too small. There were 500 dwell times in the original dataset before filtering by  $t_c$  in this case.
